# Supplementary material for: Unraveling the complexity of faba bean (Vicia faba L.) transcriptome to reveal cold-stress-responsive genes using long-read isoform sequencing technology
Source: PubMed Central journal article supplement (PMC8548339; doi:10.1038/s41598-021-00506-0), 2021-10-26
Supplement: 41598_2021_506_MOESM1_ESM.pdf [file 41598_2021_506_MOESM1_ESM.pdf]

Supplementary Table 1. Summary of the polymerase read statistics for Fababeans from PacBio sequencing

| Library | Polymerase Read length (bp) | Polymerase Reads (bp) | Polymerase Read N50 (bp) | Polymerase Read length (bp) |
|---------|-----------------------------|-----------------------|--------------------------|-----------------------------|
| 1-3kb   | 31819542182                 | 330824                | 167709                   | 96183                       |
| >3kb    | 47391599705                 | 626186                | 141667                   | 75683                       |
| Total   | 79211141887                 | 957010                | 309376                   | 171866                      |

Supplementary Table 2. Summary of the Subread statistics for Fababeans from PacBio

| Library | Subread length (bp) | Subreads | Subread N50 (bp) | Avg. Subread length (bp) |
|---------|---------------------|----------|------------------|--------------------------|
| 1-3kb   | 30808203355         | 23086802 | 1554             | 1334                     |
| >3kb    | 46843019830         | 12843385 | 3599             | 3647                     |
| Total   | 77651223185         | 35930187 | 5153             | 4981                     |

sequencing

Supplementary Table 3. Summary of circular consensus sequence (CCS)

| Category                | 1-3kb        | >3kb           | Total          |
|-------------------------|--------------|----------------|----------------|
| CCS reads               | 3,09,781     | 5,38,149       | 8,47,930       |
| Number of CCS bases     | 52,71,42,715 | 2,06,74,90,009 | 2,59,46,32,724 |
| CCS Read Length (mean)  | 1,701        | 3,841          | 5,542          |
| Number of Passes (mean) | 72           | 22             | 94             |

Supplementary Table 5. Summary of gene families involved cold stress

a) List of WCOR413 genes selected from the Fababean full-length gene set

| No. | Contig                            | NR                                                                               | Pfam      | NT                                                        |
|-----|-----------------------------------|----------------------------------------------------------------------------------|-----------|-----------------------------------------------------------|
| 1   | FaBabeanB_3kb_HQ_transcript/15469 | cold-regulated 413 plasma membrane protein 1 [Cajanus cajan]                     | PF05562.8 | Medicago truncatula cold acclimation protein WCOR413 mRNA |
| 2   | FaBabeanB_3kb_HQ_transcript/15785 | cold-regulated 413 inner membrane protein 1, chloroplastic [Medicago truncatula] | PF05562.8 | Medicago truncatula cold acclimation protein WCOR413 mRNA |
| 3   | FaBabeanB_3kb_HQ_transcript/16168 | cold-regulated 413 inner membrane protein 1, chloroplastic [Medicago truncatula] | PF05562.8 | Medicago truncatula cold acclimation protein WCOR413 mRNA |
| 4   | FaBabeanB_3kb_HQ_transcript/16543 | cold-regulated 413 plasma membrane protein 1 [Cajanus cajan]                     | PF05562.8 | Medicago truncatula clone JCVI-FLMt-11I1 unknown mRNA     |
| 5   | FaBabeanB_3kb_HQ_transcript/16601 | cold-regulated 413 plasma membrane protein 1 [Cajanus cajan]                     | PF05562.8 | Medicago truncatula cold acclimation protein WCOR413 mRNA |
| 6   | FaBabeanB_3kb_HQ_transcript/17310 | cold-regulated 413 plasma membrane protein 1 [Cajanus cajan]                     | PF05562.8 | Medicago truncatula clone JCVI-FLMt-11I1 unknown mRNA     |

b) List of DHN2 genes selected from the Fababean full-length gene set.

| No. | Contig                            | NR                               | Pfam    | NT                                               |
|-----|-----------------------------------|----------------------------------|---------|--------------------------------------------------|
| 1   | FaBabeanB_3kb_HQ_transcript/12403 | dehydrin-cognate [Pisum sativum] | PF00257 | P. sativum dhncog gene encoding dehydrin-cognate |
| 2   | FaBabeanB_3kb_HQ_transcript/14108 | dehydrin-cognate [Pisum sativum] | PF00257 | P. sativum dhncog gene encoding dehydrin-cognate |
| 3   | FaBabeanB_3kb_HQ_transcript/14197 | dehydrin-cognate [Pisum sativum] | PF00257 | P. sativum dhncog gene encoding dehydrin-cognate |
| 4   | FaBabeanB_3kb_HQ_transcript/14797 | dehydrin-cognate [Pisum sativum] | PF00257 | P. sativum dhncog gene encoding dehydrin-cognate |
| 5   | FaBabeanB_3kb_HQ_transcript/16189 | dehydrin-cognate [Pisum sativum] | PF00257 | P. sativum dhncog gene encoding dehydrin-cognate |

c) List of CBF genes selected from the Fababean full-length gene set.

|   | Contig                            | NR                                                                                                                                                             | Pfam                        | NT                                                                                                                                                                                                                                                                   |
|---|-----------------------------------|----------------------------------------------------------------------------------------------------------------------------------------------------------------|-----------------------------|----------------------------------------------------------------------------------------------------------------------------------------------------------------------------------------------------------------------------------------------------------------------|
| 1 | FaBabeanB_3kb_HQ_transcript/10266 | ethylene-responsive element binding protein [Medicago falcata]                                                                                                 | K4BN49.1<br>PF00847.17;AP2; | Medicago truncatula ethylene response factor mRNA                                                                                                                                                                                                                    |
| 2 | FaBabeanB_3kb_HQ_transcript/11169 | putative ethylene responsive factor [Vicia faba]                                                                                                               | I1KYC2.1<br>PF00847.17;AP2; | Pisum sativum AT-rich element binding factor 2 (ATF2) mRNA, complete cds                                                                                                                                                                                             |
| 3 | FaBabeanB_3kb_HQ_transcript/11742 | ethylene-responsive transcription factor ERF060 [Medicago truncatula]<br><KEH20859.1 ethylene response factor [Medicago truncatula]                            | I1K4K5.1<br>PF00847.17;AP2; | Trifolium repens clone BAC 88n22 myo-inositol-1-phosphate synthase, bristled-like protein, ethylene insensitive-like protein, bZIP transcription factor, acyl-coA oxidase, and dehydration responsive element binding protein genes, complete cds; and unknown genes |
| 4 | FaBabeanB_3kb_HQ_transcript/12219 | putative ethylene responsive factor [Vicia faba]                                                                                                               | I1KYC2.1<br>PF00847.17;AP2; | Pisum sativum AT-rich element binding factor 2 (ATF2) mRNA, complete cds                                                                                                                                                                                             |
| 5 | FaBabeanB_3kb_HQ_transcript/12237 | putative ethylene responsive factor [Vicia faba]                                                                                                               | I1KYC2.1<br>PF00847.17;AP2; | Pisum sativum AT-rich element binding factor 2 (ATF2) mRNA, complete cds                                                                                                                                                                                             |
| 6 | FaBabeanB_3kb_HQ_transcript/13400 | hypothetical protein PHAVU_002G016700g [Phaseolus vulgaris]<br><ESW28771.1<br>hypothetical protein PHAVU_002G016700g [Phaseolus vulgaris]                      | Q8W3M3.1<br>PF00847.17;AP2; | Medicago truncatula chromosome 5 clone mth2-28f11, COMPLETE SEQUENCE                                                                                                                                                                                                 |
| 7 | FaBabeanB_3kb_HQ_transcript/14307 | ethylene-responsive transcription factor-like protein At4g13040 isoform X2 [Medicago truncatula]<br><KEH22585.1 ethylene response factor [Medicago truncatula] | K4CTN5.1<br>PF00847.17;AP2; | Medicago truncatula ethylene response factor mRNA                                                                                                                                                                                                                    |

|    |                                   |                                                                                                                                            |                                 |                                                                                                      |
|----|-----------------------------------|--------------------------------------------------------------------------------------------------------------------------------------------|---------------------------------|------------------------------------------------------------------------------------------------------|
| 8  | FaBabeanB_3kb_HQ_transcript/14546 | putative ethylene responsive factor [Vicia faba]                                                                                           | I1KYC2.1<br>PF00847.17;AP2;     | Pisum sativum AT-rich element binding factor 2 (ATF2) mRNA, complete cds                             |
| 9  | FaBabeanB_3kb_HQ_transcript/14633 | hypothetical protein PHAVU_002G016700g [Phaseolus vulgaris] <ESW28771.1<br>hypothetical protein PHAVU_002G016700g [Phaseolus vulgaris]     | Q8W3M3.1<br>PF00847.17;AP2;     | Medicago truncatula ethylene response factor mRNA                                                    |
| 10 | FaBabeanB_3kb_HQ_transcript/14636 | unknown [Medicago truncatula]                                                                                                              | A0A072V5S6.1<br>PF00847.17;AP2; | Vicia faba putative ethylene responsive factor (ERF2) mRNA, complete cds                             |
| 11 | FaBabeanB_3kb_HQ_transcript/14775 | putative ethylene responsive factor [Vicia faba]                                                                                           | I1KYC2.1<br>PF00847.17;AP2;     | Pisum sativum AT-rich element binding factor 2 (ATF2) mRNA, complete cds                             |
| 12 | FaBabeanB_3kb_HQ_transcript/15647 | ethylene-responsive transcription factor ERF104 [Medicago truncatula] <KEH41321.1 ethylene response factor [Medicago truncatula]           | A0A072VI96.1<br>PF00847.17;AP2; | Medicago truncatula ethylene response factor mRNA                                                    |
| 13 | FaBabeanB_3kb_HQ_transcript/15870 | DREB transcription factor 1 [Medicago ruthenica]                                                                                           | A0A072UL75.1<br>PF00847.17;AP2; | Medicago sativa subsp. falcata putative DRE-binding protein DREB1 (DREB1) mRNA, complete cds         |
| 14 | FaBabeanB_3kb_HQ_transcript/15890 | ethylene response factor 8 [Medicago sativa]                                                                                               | I1LCJ0.1<br>PF00847.17;AP2;     | Medicago sativa ethylene response factor 8 (ERF8) mRNA, complete cds                                 |
| 15 | FaBabeanB_3kb_HQ_transcript/16889 | ethylene-responsive transcription factor rap2-1-like protein [Trifolium pratense]                                                          | M1ADM5.1<br>PF00847.17;AP2;     | PREDICTED: Cicer arietinum ethylene-responsive transcription factor RAP2-1-like (LOC101512420), mRNA |
| 16 | FaBabeanB_3kb_HQ_transcript/17432 | pathogenesis-related genes transcriptional activator PTI5 [Medicago truncatula] <AES63941.1 ethylene response factor [Medicago truncatula] | K7M1F8.1<br>PF00847.17;AP2;     | Medicago truncatula ethylene response factor mRNA                                                    |

|    |                                  |                                                                                                                                                                                                            |                                 |                                                                                       |
|----|----------------------------------|------------------------------------------------------------------------------------------------------------------------------------------------------------------------------------------------------------|---------------------------------|---------------------------------------------------------------------------------------|
| 17 | FaBabeanB_3kb_HQ_transcript/4409 | APETAL2-like protein [Pisum sativum]                                                                                                                                                                       | A0A060CZG0.1<br>PF00847.17;AP2; | Pisum sativum APETAL2-like protein mRNA, complete cds                                 |
| 18 | FaBabeanB_3kb_HQ_transcript/4589 | PREDICTED: floral homeotic protein APETALA 2-like [Cicer arietinum]                                                                                                                                        | A0A060CZG0.1<br>PF00847.17;AP2; | Pisum sativum APETAL2-like protein mRNA, complete cds                                 |
| 19 | FaBabeanB_3kb_HQ_transcript/5672 | floral homeotic protein APETALA 2 isoform X2 [Medicago truncatula] <AES94650.1 AP2 domain transcription factor [Medicago truncatula]                                                                       | A0A060CZG0.1<br>PF00847.17;AP2; | Medicago truncatula AP2 domain transcription factor mRNA                              |
| 20 | FaBabeanB_3kb_HQ_transcript/6011 | ethylene-responsive transcription factor erf118-like protein [Trifolium pratense]                                                                                                                          | K4BXB9.1<br>PF00847.17;AP2;     | Medicago truncatula ethylene-responsive transcription factor ERF118-like protein mRNA |
| 21 | FaBabeanB_3kb_HQ_transcript/6590 | ethylene-responsive transcription factor rap2-7-like protein [Trifolium pratense]                                                                                                                          | A0A060CZG0.1<br>PF00847.17;AP2; | Medicago truncatula AP2-like ethylene-responsive transcription factor mRNA            |
| 22 | FaBabeanB_3kb_HQ_transcript/6834 | ethylene-responsive transcription factor RAP2-4 [Medicago truncatula] <AEX93413.1 putative AP2/EREBP transcription factor [Medicago truncatula] <KEH34901.1 ethylene response factor [Medicago truncatula] | C5YKT7.1<br>PF00847.17;AP2;     | Medicago truncatula ethylene response factor mRNA                                     |
| 23 | FaBabeanB_3kb_HQ_transcript/7404 | ethylene-responsive transcription factor erf118-like protein [Trifolium pratense]                                                                                                                          | K4BXB9.1<br>PF00847.17;AP2;     | Medicago truncatula ethylene-responsive transcription factor ERF118-like protein mRNA |
| 24 | FaBabeanB_3kb_HQ_transcript/7813 | ethylene-responsive element binding protein [Medicago falcata]                                                                                                                                             | K4BN49.1<br>PF00847.17;AP2;     | Medicago truncatula ethylene response factor mRNA                                     |
| 25 | FaBabeanB_3kb_HQ_transcript/8585 | ethylene-responsive element binding protein [Medicago falcata]                                                                                                                                             | K4BN49.1<br>PF00847.17;AP2;     | Medicago truncatula ethylene response factor mRNA                                     |

|    |                                     |                                                                                            |                                 |                                                                                                              |
|----|-------------------------------------|--------------------------------------------------------------------------------------------|---------------------------------|--------------------------------------------------------------------------------------------------------------|
| 26 | FaBabeanB_3kb_HQ_transcript/9776    | ethylene-responsive<br>element binding<br>protein [Medicago<br>falcata]                    | K4BN49.1<br>PF00847.17;AP2;     | Medicago truncatula<br>ethylene response factor<br>mRNA                                                      |
| 27 | FaBabeanB_3kbup_HQ_transcript/14070 | disease resistance<br>protein rga3-like<br>[Trifolium pratense]                            | I1JHM5.1<br>PF00847.17;AP2;     | PREDICTED: Cicer<br>arietinum disease<br>resistance protein RGA2-<br>like (LOC101498365),<br>mRNA            |
| 28 | FaBabeanB_3kbup_HQ_transcript/22496 | ethylene-responsive<br>transcription factor<br>rap2-7-like protein<br>[Trifolium pratense] | A0A060CZG0.1<br>PF00847.17;AP2; | PREDICTED: Cicer<br>arietinum ethylene-<br>responsive transcription<br>factor RAP2-7<br>(LOC101489539), mRNA |
| 29 | FaBabeanB_3kbup_HQ_transcript/8966  | disease resistance<br>protein rga3-like<br>[Trifolium pratense]                            | I1JHM5.1<br>PF00847.17;AP2;     | Medicago truncatula<br>clone mth2-24f15,<br>complete sequence                                                |
| 30 | FaBabeanB_3kbup_HQ_transcript/9360  | disease resistance<br>protein rga3-like<br>[Trifolium pratense]                            | I1JHM5.1<br>PF00847.17;AP2;     | PREDICTED: Cicer<br>arietinum disease<br>resistance protein RGA2-<br>like (LOC101498365),<br>mRNA            |

d) List of ICE genes selected from the Fababean full-length gene set.

|    | Contig                            | NR                                                                                                                                        | Pfam                            | NT                                                                                                |
|----|-----------------------------------|-------------------------------------------------------------------------------------------------------------------------------------------|---------------------------------|---------------------------------------------------------------------------------------------------|
| 1  | FaBabeanB_3kb_HQ_transcript/10596 | transcription factor bHLH63 isoform X2 [Medicago truncatula] <AES74186.2 BHLH transcription factor [Medicago truncatula]                  | M4D4Y3.1<br>PF00010.23;HLH;     | Medicago truncatula clone JCVI-FLMt-18N21 unknown mRNA                                            |
| 2  | FaBabeanB_3kb_HQ_transcript/10652 | hypothetical protein TSUD_333600 [Trifolium subterraneum]                                                                                 | G7ICN0.1<br>PF00010.23;HLH;     | PREDICTED: Cicer arietinum transcription factor UNE12 (LOC101502533), transcript variant X2, mRNA |
| 3  | FaBabeanB_3kb_HQ_transcript/10870 | transcription factor bHLH63 [Medicago truncatula] <AES89129.1 transcription factor [Medicago truncatula]                                  | M4D4Y3.1<br>PF00010.23;HLH;     | Medicago truncatula transcription factor mRNA                                                     |
| 4  | FaBabeanB_3kb_HQ_transcript/11233 | transcription factor bHLH63 [Medicago truncatula] <AES89129.1 transcription factor [Medicago truncatula]                                  | M4D4Y3.1<br>PF00010.23;HLH;     | Medicago truncatula transcription factor mRNA                                                     |
| 5  | FaBabeanB_3kb_HQ_transcript/11366 | transcription factor bHLH63 [Medicago truncatula] <AES89129.1 transcription factor [Medicago truncatula]                                  | M4D4Y3.1<br>PF00010.23;HLH;     | Medicago truncatula transcription factor mRNA                                                     |
| 6  | FaBabeanB_3kb_HQ_transcript/11633 | transcription factor bHLH7 isoform X1 [Medicago truncatula] <AES60927.1 helix loop helix DNA-binding domain protein [Medicago truncatula] | A0A072VLC0.1<br>PF00010.23;HLH; | Medicago truncatula helix loop helix DNA-binding domain protein mRNA                              |
| 7  | FaBabeanB_3kb_HQ_transcript/11828 | transcription factor bHLH63 [Medicago truncatula] <AES89129.1 transcription factor [Medicago truncatula]                                  | M4D4Y3.1<br>PF00010.23;HLH;     | Medicago truncatula transcription factor mRNA                                                     |
| 8  | FaBabeanB_3kb_HQ_transcript/11855 | transcription factor BIM2 [Medicago truncatula] <AES97297.1 transcription factor BIM2-like protein [Medicago truncatula]                  | G7JZB3.1<br>PF00010.23;HLH;     | PREDICTED: Cicer arietinum transcription factor BIM2 (LOC101511604), mRNA                         |
| 9  | FaBabeanB_3kb_HQ_transcript/11858 | hypothetical protein TSUD_141490 [Trifolium subterraneum]                                                                                 | I1GN25.1<br>PF00010.23;HLH;     | Medicago truncatula BHLH transcription factor-like protein mRNA                                   |
| 10 | FaBabeanB_3kb_HQ_transcript/11871 | transcription factor BIM2 [Medicago truncatula] <AES97297.1 transcription factor BIM2-like protein [Medicago truncatula]                  | G7JZB3.1<br>PF00010.23;HLH;     | PREDICTED: Cicer arietinum transcription factor BIM2 (LOC101511604), mRNA                         |
| 11 | FaBabeanB_3kb_HQ_transcript/12406 | hypothetical protein TSUD_00230 [Trifolium subterraneum]                                                                                  | B9IAD1.1<br>PF00010.23;HLH;     | PREDICTED: Cicer arietinum transcription factor bHLH128-like (LOC101501688), mRNA                 |
| 12 | FaBabeanB_3kb_HQ_transcript/12832 | PREDICTED: transcription factor bHLH79-like [Cicer arietinum]                                                                             | K7K628.1<br>PF00010.23;HLH;     | PREDICTED: Cicer arietinum transcription factor bHLH79-like (LOC101513654), mRNA                  |
| 13 | FaBabeanB_3kb_HQ_transcript/13571 | PREDICTED: transcription factor ILR3-like [Cicer arietinum]                                                                               | B9SA09.1<br>PF00010.23;HLH;     | Medicago truncatula BHLH domain class transcription factor mRNA                                   |
| 14 | FaBabeanB_3kb_HQ_transcript/15326 | hypothetical protein TSUD_172970 [Trifolium subterraneum]                                                                                 | B9IBW9.2<br>PF00010.23;HLH;     | PREDICTED: Cicer arietinum transcription factor UNE10 (LOC101492173), mRNA                        |
| 15 | FaBabeanB_3kb_HQ_transcript/15388 | transcription factor bHLH47-like protein [Trifolium pratense]                                                                             | M0SG68.1<br>PF00010.23;HLH;     | PREDICTED: Cicer arietinum transcription factor bHLH47 (LOC101512450), mRNA                       |

|    |                                   |                                                                                                                                                                                                                      |                                 |                                                                                                            |
|----|-----------------------------------|----------------------------------------------------------------------------------------------------------------------------------------------------------------------------------------------------------------------|---------------------------------|------------------------------------------------------------------------------------------------------------|
| 16 | FaBabeanB_3kb_HQ_transcript/15669 | hypothetical protein<br>TSUD_101990 [Trifolium<br>subterraneum]                                                                                                                                                      | B9SA09.1<br>PF00010.23;HLH;     | Medicago truncatula BHLH<br>domain class transcription<br>factor mRNA                                      |
| 17 | FaBabeanB_3kb_HQ_transcript/15835 | hypothetical protein<br>TSUD_101990 [Trifolium<br>subterraneum]                                                                                                                                                      | B9SA09.1<br>PF00010.23;HLH;     | Medicago truncatula BHLH<br>domain class transcription<br>factor mRNA                                      |
| 18 | FaBabeanB_3kb_HQ_transcript/16148 | PREDICTED: transcription<br>factor bHLH104-like [Cicer<br>arietinum]                                                                                                                                                 | G7I5E7.1<br>PF00010.23;HLH;     | Medicago truncatula BHLH<br>domain class transcription<br>factor mRNA                                      |
| 19 | FaBabeanB_3kb_HQ_transcript/2201  | hypothetical protein<br>TSUD_208340 [Trifolium<br>subterraneum]                                                                                                                                                      | A0A0D3CAD2.1<br>PF00010.23;HLH; | Medicago truncatula<br>transcription factor BIM2-<br>like protein mRNA                                     |
| 20 | FaBabeanB_3kb_HQ_transcript/5257  | transcription factor bHLH130<br>[Medicago truncatula]<br><AES67711.1 transcription<br>factor bHLH122-like protein<br>[Medicago truncatula]                                                                           | V4KKA9.1<br>PF00010.23;HLH;     | Medicago truncatula<br>transcription factor<br>bHLH122-like protein<br>mRNA                                |
| 21 | FaBabeanB_3kb_HQ_transcript/5850  | hypothetical protein<br>TSUD_322910 [Trifolium<br>subterraneum]                                                                                                                                                      | A0A0D3DPE4.1<br>PF00010.23;HLH; | Medicago truncatula basic<br>helix loop helix protein<br>BHLH23 mRNA                                       |
| 22 | FaBabeanB_3kb_HQ_transcript/6444  | transcription factor PIF4<br>isoform X2 [Medicago<br>truncatula]                                                                                                                                                     | M0STT9.1<br>PF00010.23;HLH;     | Medicago truncatula<br>transcription factor partial<br>mRNA                                                |
| 23 | FaBabeanB_3kb_HQ_transcript/6602  | hypothetical protein<br>TSUD_172970 [Trifolium<br>subterraneum]                                                                                                                                                      | B9IBW9.2<br>PF00010.23;HLH;     | PREDICTED: Cicer<br>arietinum transcription factor<br>UNE10 (LOC101492173),<br>mRNA                        |
| 24 | FaBabeanB_3kb_HQ_transcript/6688  | hypothetical protein<br>TSUD_109710 [Trifolium<br>subterraneum]                                                                                                                                                      | V4KKA9.1<br>PF00010.23;HLH;     | Medicago truncatula<br>transcription factor<br>bHLH122-like protein<br>mRNA                                |
| 25 | FaBabeanB_3kb_HQ_transcript/7482  | transcription factor PIF1<br>isoform X1 [Medicago<br>truncatula]<br><XP_024625778.1<br>transcription factor PIF1<br>isoform X1 [Medicago<br>truncatula] <AES81693.1<br>transcription factor<br>[Medicago truncatula] | A0A022PNX7.1<br>PF00010.23;HLH; | Medicago truncatula<br>transcription factor mRNA                                                           |
| 26 | FaBabeanB_3kb_HQ_transcript/7624  | hypothetical protein<br>TSUD_172970 [Trifolium<br>subterraneum]                                                                                                                                                      | B9IBW9.2<br>PF00010.23;HLH;     | PREDICTED: Cicer<br>arietinum transcription factor<br>UNE10 (LOC101492173),<br>mRNA                        |
| 27 | FaBabeanB_3kb_HQ_transcript/8089  | transcription factor<br>bHLH144-like protein<br>[Trifolium pratense]                                                                                                                                                 | M1AF13.1<br>PF00010.23;HLH;     | PREDICTED: Cicer<br>arietinum transcription factor<br>bHLH144-like<br>(LOC101491896), mRNA                 |
| 28 | FaBabeanB_3kb_HQ_transcript/8238  | transcription factor bHLH130<br>[Medicago truncatula]<br><AES67711.1 transcription<br>factor bHLH122-like protein<br>[Medicago truncatula]                                                                           | V4KKA9.1<br>PF00010.23;HLH;     | Medicago truncatula<br>transcription factor<br>bHLH122-like protein<br>mRNA                                |
| 29 | FaBabeanB_3kb_HQ_transcript/8552  | hypothetical protein<br>TSUD_333600 [Trifolium<br>subterraneum]                                                                                                                                                      | G7ICN0.1<br>PF00010.23;HLH;     | PREDICTED: Cicer<br>arietinum transcription factor<br>UNE12 (LOC101502533),<br>transcript variant X2, mRNA |
| 30 | FaBabeanB_3kb_HQ_transcript/8643  | hypothetical protein<br>TSUD_413200 [Trifolium<br>subterraneum]                                                                                                                                                      | V4KKA9.1<br>PF00010.23;HLH;     | Medicago truncatula<br>transcription factor<br>bHLH122-like protein<br>mRNA                                |
| 31 | FaBabeanB_3kb_HQ_transcript/8747  | hypothetical protein<br>TSUD_172970 [Trifolium<br>subterraneum]                                                                                                                                                      | B9IBW9.2<br>PF00010.23;HLH;     | PREDICTED: Cicer<br>arietinum transcription factor<br>UNE10 (LOC101492173),<br>mRNA                        |
| 32 | FaBabeanB_3kb_HQ_transcript/8850  | hypothetical protein<br>TSUD_172970 [Trifolium<br>subterraneum]                                                                                                                                                      | B9IBW9.2<br>PF00010.23;HLH;     | PREDICTED: Cicer<br>arietinum transcription factor<br>UNE10 (LOC101492173),<br>mRNA                        |



|    |                                     |                                                                                                                            |                                 |                                                                                 |
|----|-------------------------------------|----------------------------------------------------------------------------------------------------------------------------|---------------------------------|---------------------------------------------------------------------------------|
|    |                                     |                                                                                                                            |                                 | mRNA                                                                            |
| 33 | FaBabeanB_3kb_HQ_transcript/8965    | transcription factor PIF1-like protein, partial [Trifolium pratense]                                                       | A0A022PNX7.1<br>PF00010.23;HLH; | Medicago truncatula transcription factor mRNA                                   |
| 34 | FaBabeanB_3kb_HQ_transcript/9166    | PREDICTED: transcription factor bHLH48 [Cicer arietinum]                                                                   | K3XXX3.1<br>PF00010.23;HLH;     | PREDICTED: Cicer arietinum transcription factor bHLH48 (LOC101495752), mRNA     |
| 35 | FaBabeanB_3kb_HQ_transcript/9563    | transcription factor UNE12 [Medicago truncatula] <KEH43018.1 transcription factor UNE12-like protein [Medicago truncatula] | G7ICN0.1<br>PF00010.23;HLH;     | Medicago truncatula transcription factor UNE12-like protein mRNA                |
| 36 | FaBabeanB_3kb_HQ_transcript/9973    | hypothetical protein TSUD_26280 [Trifolium subterraneum]                                                                   | G7ICN0.1<br>PF00010.23;HLH;     | PREDICTED: Cicer arietinum transcription factor UNE12-like (LOC101488285), mRNA |
| 37 | FaBabeanB_3kbup_HQ_transcript/15686 | hypothetical protein TSUD_208340 [Trifolium subterraneum]                                                                  | M0TJ47.1<br>PF00010.23;HLH;     | Medicago truncatula transcription factor BIM2-like protein mRNA                 |
| 38 | FaBabeanB_3kbup_HQ_transcript/15902 | hypothetical protein TSUD_388230 [Trifolium subterraneum]                                                                  | I1GN25.1<br>PF00010.23;HLH;     | Medicago truncatula BHLH transcription factor-like protein mRNA                 |
| 39 | FaBabeanB_3kbup_HQ_transcript/17060 | phytochrome-interacting factor 3.1 [Medicago truncatula]                                                                   | M0YQ17.1<br>PF00010.23;HLH;     | Medicago truncatula phytochrome-interacting factor 3.1 mRNA                     |
| 40 | FaBabeanB_3kbup_HQ_transcript/17409 | hypothetical protein TSUD_172970 [Trifolium subterraneum]                                                                  | B9IBW9.2<br>PF00010.23;HLH;     | PREDICTED: Cicer arietinum transcription factor UNE10 (LOC101492173), mRNA      |
| 41 | FaBabeanB_3kbup_HQ_transcript/19322 | hypothetical protein TSUD_172970 [Trifolium subterraneum]                                                                  | B9IBW9.2<br>PF00010.23;HLH;     | PREDICTED: Cicer arietinum transcription factor UNE10 (LOC101492173), mRNA      |
| 42 | FaBabeanB_3kbup_HQ_transcript/21105 | PREDICTED: transcription factor bHLH79-like [Cicer arietinum]                                                              | K7K628.1<br>PF00010.23;HLH;     | Medicago truncatula chromosome 5 clone mth4-7g23, COMPLETE SEQUENCE             |
| 43 | FaBabeanB_3kbup_HQ_transcript/21273 | PREDICTED: transcription factor PIF3 isoform X2 [Cicer arietinum]                                                          | A0A0D3EMM9.1<br>PF00010.23;HLH; | Medicago truncatula phytochrome-interacting factor 3.1 mRNA                     |
| 44 | FaBabeanB_3kbup_HQ_transcript/23879 | PREDICTED: transcription factor PIF3 isoform X2 [Cicer arietinum]                                                          | A0A0D3EMM9.1<br>PF00010.23;HLH; | Medicago truncatula phytochrome-interacting factor 3.1 mRNA                     |
| 45 | FaBabeanB_3kbup_HQ_transcript/24101 | transcription factor PIF4 isoform X1 [Medicago truncatula] <KEH33641.1 transcription factor [Medicago truncatula]          | M0STT9.1<br>PF00010.23;HLH;     | Medicago truncatula transcription factor partial mRNA                           |

e) List of COR genes selected from the Fababean full-length gene set.

| No. | Contig                            | NR                                                                                   | Pfam    | NT                                                                                  |
|-----|-----------------------------------|--------------------------------------------------------------------------------------|---------|-------------------------------------------------------------------------------------|
| 1   | FaBabeanB_3kb_HQ_transcript/14478 | chlorophyll a-b binding protein CP24 10A, chloroplastic [Medicago truncatula]        | PF00504 | Medicago truncatula light-harvesting complex I chlorophyll A/B-binding protein mRNA |
| 2   | FaBabeanB_3kb_HQ_transcript/15109 | chlorophyll a-b binding protein CP24 10A, chloroplastic [Medicago truncatula]        | PF00504 | Medicago truncatula light-harvesting complex I chlorophyll A/B-binding protein mRNA |
| 3   | FaBabeanB_3kb_HQ_transcript/16562 | chlorophyll a-b binding protein CP24 10A, chloroplastic [Medicago truncatula]        | PF00504 | Medicago truncatula light-harvesting complex I chlorophyll A/B-binding protein mRNA |
| 4   | FaBabeanB_3kb_HQ_transcript/17484 | Chain 4, Structure Of Stacked C2s2m2-type Psii-lhcii Supercomplex From Pisum Sativum | PF00504 | Medicago truncatula light-harvesting complex I chlorophyll A/B-binding protein mRNA |
| 5   | FaBabeanB_3kb_HQ_transcript/18387 | Chain 4, Structure Of Stacked C2s2m2-type Psii-lhcii Supercomplex From Pisum Sativum | PF00504 | Medicago truncatula light-harvesting complex I chlorophyll A/B-binding protein mRNA |
| 6   | FaBabeanB_3kb_HQ_transcript/18974 | Chain 4, Structure Of Stacked C2s2m2-type Psii-lhcii Supercomplex From Pisum Sativum | PF00504 | Medicago truncatula light-harvesting complex I chlorophyll A/B-binding protein mRNA |
| 7   | FaBabeanB_3kb_HQ_transcript/19075 | Chain 4, Structure Of Stacked C2s2m2-type Psii-lhcii Supercomplex From Pisum Sativum | PF00504 | Medicago truncatula light-harvesting complex I chlorophyll A/B-binding protein mRNA |
| 8   | FaBabeanB_3kb_HQ_transcript/19425 | PREDICTED: chlorophyll a-b binding protein CP24 10A, chloroplastic [Cicer arietinum] | PF00504 | Medicago truncatula light-harvesting complex I chlorophyll A/B-binding protein mRNA |
| 9   | FaBabeanB_3kb_HQ_transcript/19606 | PREDICTED: chlorophyll a-b binding protein CP24 10A, chloroplastic [Cicer arietinum] | PF00504 | Medicago truncatula light-harvesting complex I chlorophyll A/B-binding protein mRNA |

f) List of DHN2 genes selected from the Fababean full-length gene set.

| No. | Contig                            | NR                                                    | Pfam    | NT                                                            |
|-----|-----------------------------------|-------------------------------------------------------|---------|---------------------------------------------------------------|
| 1   | FaBabeanB_3kb_HQ_transcript/15951 | HVA22-like protein a isoform X1 [Medicago truncatula] | PF03134 | <i>Medicago truncatula</i> TB2/DP1, HVA22 family protein mRNA |

Supplementary Table 6. Primer information used for expression analysis

| Primer Name   | Primer sequences (5' →3')                                                |
|---------------|--------------------------------------------------------------------------|
| WCOR413_15785 | (F) TGT GCA ACA AGA AAG CAA GC<br>(R) CAG TTC GTG CAT TTG CAG TT         |
| DHN2_12403    | (F) CCA CTC ATC AAT ATC GGT CAC<br>(R) TTG ACT ATA CAT GCA CAC ATC AAA A |
| DHN2_14197    | (F) GGC CTT GTG TGG TGA TTT CT<br>(R) GAA CCA AAC ACA TAT CAT CAA GA     |
| DHN2_14797    | (F) GCG CTC TCT CAT CTC TCA GC<br>(R) CTG ATT CTC CTC AGC CAT GAT        |
| COR15_14478   | (F) TGG ACA AGG GAA GAC TCC AC<br>(R) CAG ACA TAA GGT AAA TGC ATC CAA    |

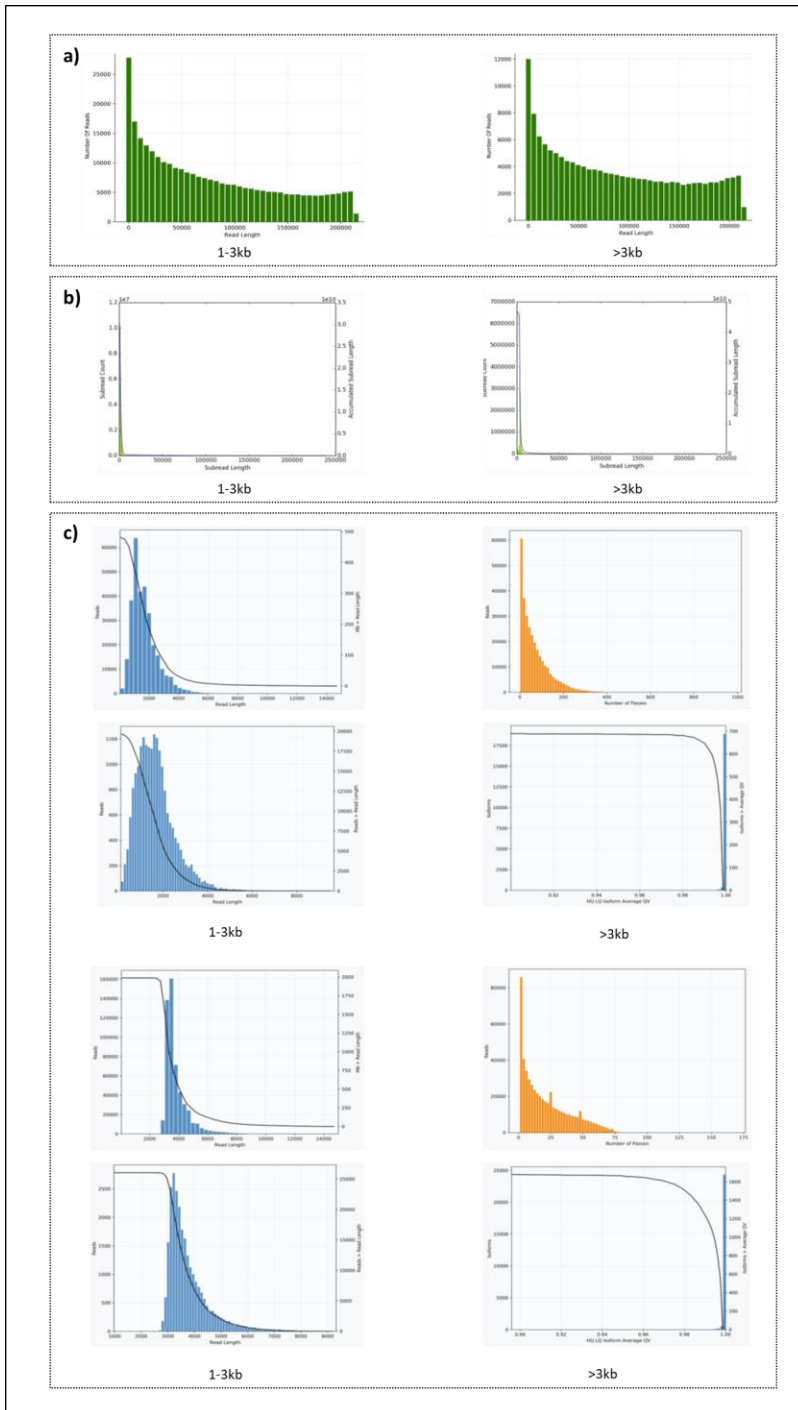

Supplementary Figure 1. Summary of a) Polymerase read length distribution b) Subread length distribution c) CCS read length distribution; Number of passes; Read length of consensus isoform reads; Average Quality value of HQ and LQ isoforms

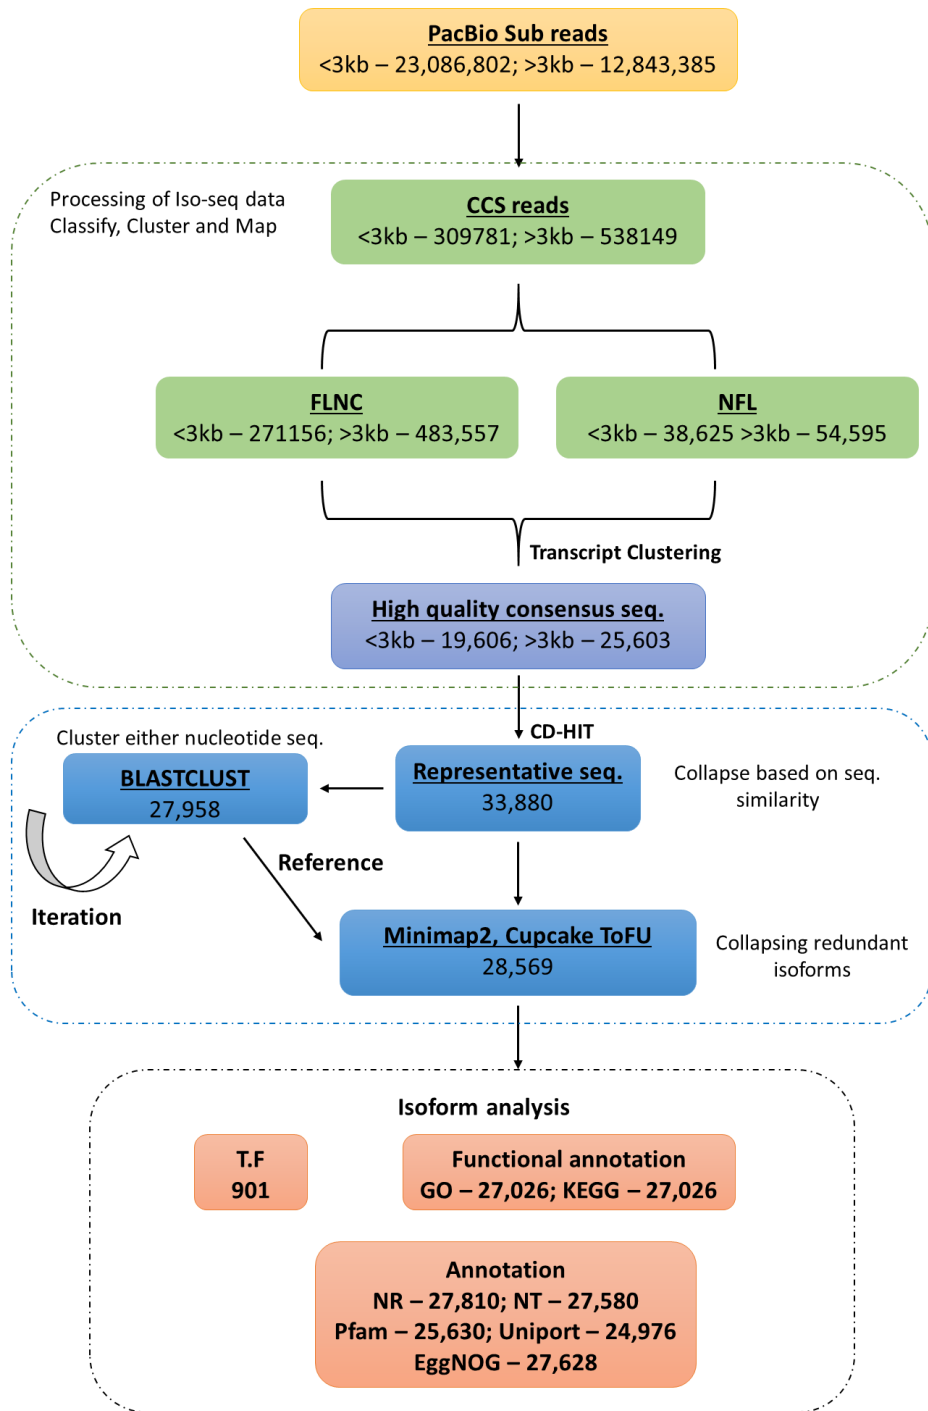

Supplementary Figure 2. Basic Iso-seq workflow
